# Supplementary material for: French Survey on Pain Perception and Management in Patients with Locked-In Syndrome
Source: MDPI journal article supplement (doi:10.3390/diagnostics12030769), 2022-03-21
Supplement: s1 [file s1]

**Table S2. Bivariate analysis of the relationship between the presence or absence of pain and demographic information of the patients included in the study.**

| Variable                               | Overall,<br>N = 51 | Presence of pain |             | p-value           |
|----------------------------------------|--------------------|------------------|-------------|-------------------|
|                                        |                    | No, N = 26       | Yes, N = 25 |                   |
| <b>Sex, n (%)</b>                      |                    |                  |             | 0,31 <sup>1</sup> |
| Female                                 | 18 (50%)           | 8 (40%)          | 10 (62%)    |                   |
| Male                                   | 18 (50%)           | 12 (60%)         | 6 (38%)     |                   |
| Unknown                                | 15                 | 6                | 9           |                   |
| <b>Etiology, n (%)</b>                 |                    |                  |             | 0,57 <sup>2</sup> |
| Infection                              | 2 (4%)             | 2 (8%)           | 0 (0%)      |                   |
| Other                                  | 4 (8%)             | 2 (8%)           | 2 (8%)      |                   |
| Stroke                                 | 41 (80%)           | 20 (77%)         | 21 (84%)    |                   |
| Traumatic brain injury                 | 4 (7%)             | 2 (8%)           | 2 (8%)      |                   |
| <b>Tracheotomy, n (%)</b>              |                    |                  |             | 0,21 <sup>2</sup> |
| No                                     | 25 (49%)           | 15 (29%)         | 10 (20%)    |                   |
| Yes                                    | 26 (51%)           | 11 (22%)         | 15 (29%)    |                   |
| <b>Gastrostomy, n (%)</b>              |                    |                  |             | 0,17 <sup>1</sup> |
| No                                     | 17 (33%)           | 11 (22%)         | 6 (12%)     |                   |
| Yes                                    | 34 (67%)           | 15 (29%)         | 19 (37%)    |                   |
| <b>Time since injury, Median (IQR)</b> | 9 (6 – 18)         | 10 (6 – 16)      | 6 (3 – 18)  | 0,26 <sup>3</sup> |

<sup>1</sup>Pearson's Chi-squared test; <sup>2</sup>Fisher's exact test; <sup>3</sup>Wilcoxon rank sum test
