# Supplementary material for: French Survey on Pain Perception and Management in Patients with Locked-In Syndrome
Source: MDPI journal article supplement (doi:10.3390/diagnostics12030769), 2022-03-21
Supplement: s1 [file s1]

**Table S1. Questions included in the survey** (VAS = Visual Analogue Scale, SD = standard deviation).

| Items and responses                                                                                                                                       | Total of respondents | Mean VAS score $\pm$ SD | Frequency (%) |
|-----------------------------------------------------------------------------------------------------------------------------------------------------------|----------------------|-------------------------|---------------|
| <b>1. Have you felt pain or physical discomfort these last two weeks?</b>                                                                                 | <b>51</b>            |                         |               |
| Yes                                                                                                                                                       | 25                   |                         | 49            |
| No                                                                                                                                                        | 26                   |                         | 51            |
| <b>2. If you feel pain, on which place(s) of your body is it? (several choices possible)</b>                                                              | <b>25</b>            |                         |               |
| Lower limb                                                                                                                                                | 21                   |                         | 84            |
| Upper limb                                                                                                                                                | 6                    |                         | 24            |
| Abdominals                                                                                                                                                | 4                    |                         | 16            |
| Back                                                                                                                                                      | 5                    |                         | 20            |
| Head                                                                                                                                                      | 7                    |                         | 28            |
| Diffuse                                                                                                                                                   | 2                    |                         | 8             |
| <b>3. Indicate on a scale ranging from 0 to 10 the intensity of the MOST INTENSE PAIN felt these last two weeks (0 = no pain, 10 = most intense pain)</b> | <b>25</b>            | 6.16 $\pm$ 2.44         |               |
| <b>4. Indicate on a scale ranging from 0 to 10 the intensity of the LESS INTENSE PAIN felt these last two weeks (0 = no pain, 10 = most intense pain)</b> | <b>25</b>            | 1.88 $\pm$ 2.55         |               |
| <b>5. Indicate on a scale ranging from 0 to 10 the intensity of the MEAN PAIN felt these last two weeks (0 = no pain, 10 = most intense pain)</b>         | <b>25</b>            | 4.20 $\pm$ 1.98         |               |
| <b>6. Does the pain have one or more of the following characteristics? (several choices possible)</b>                                                     | <b>25</b>            |                         |               |
| 0 = no features                                                                                                                                           | 10                   |                         | 40            |
| 1 = burn                                                                                                                                                  | 6                    |                         | 24            |
| 2 = painful cold sensation                                                                                                                                | 4                    |                         | 16            |
| 3 = electrical shocks                                                                                                                                     | 10                   |                         | 40            |
| <b>7. Do you experience other symptom(s) in the painful area? (several choices possible)</b>                                                              | <b>25</b>            |                         |               |
| None                                                                                                                                                      | 9                    |                         | 36            |
| Tingling                                                                                                                                                  | 5                    |                         | 20            |
| Pinprick                                                                                                                                                  | 6                    |                         | 24            |
| Numbness                                                                                                                                                  | 6                    |                         | 24            |
| Itches                                                                                                                                                    | 3                    |                         | 12            |
| Feeling of vice                                                                                                                                           | 12                   |                         | 48            |
| <b>8. Do you feel a decrease in touch sensitivity in areas where pain is present?</b>                                                                     | <b>25</b>            |                         |               |
| Decreased sensitivity during sting                                                                                                                        | 20                   |                         | 80            |
| Decreased sensitivity during simple touch                                                                                                                 | 3                    |                         | 12            |
| No decrease in sensitivity                                                                                                                                | 2                    |                         | 8             |
| <b>9. Is pain caused or increased by friction?</b>                                                                                                        | <b>25</b>            |                         |               |
| Yes                                                                                                                                                       | 8                    |                         | 32            |
| No                                                                                                                                                        | 17                   |                         | 68            |
| <b>10. Indicate since when you feel these pains:</b>                                                                                                      | <b>25</b>            |                         |               |
| 1-15 days                                                                                                                                                 | 0                    |                         | 0             |
| 15 days - 1month                                                                                                                                          | 0                    |                         | 0             |
| 1 -3 months                                                                                                                                               | 2                    |                         | 8             |
| 3 -6 months                                                                                                                                               | 6                    |                         | 24            |
| 6 months -1 year                                                                                                                                          | 5                    |                         | 20            |
| > 1 year                                                                                                                                                  | 12                   |                         | 48            |
| <b>11. Before the locked-in syndrome, did you already have these pains?</b>                                                                               | <b>25</b>            |                         |               |
| Yes                                                                                                                                                       | 2                    |                         | 8             |

|                                                                                                                                                                             |           |                   |     |
|-----------------------------------------------------------------------------------------------------------------------------------------------------------------------------|-----------|-------------------|-----|
| No                                                                                                                                                                          | 21        |                   | 84  |
| I do not know                                                                                                                                                               | 2         |                   | 8   |
| <b>12. If you already had pain before the locked-in syndrome, indicate on a scale ranging from 0 to 10 the intensity of this pain (0 = no pain, 10 = most intense pain)</b> | <b>25</b> | <b>2.5 ± 2.08</b> |     |
| <b>13. If you had this pain before, how did your pain progress following the locked-in syndrome?</b>                                                                        | <b>4</b>  |                   |     |
| Aggravation of pain                                                                                                                                                         | 0         |                   | 0   |
| Decrease of pain                                                                                                                                                            | 2         |                   | 50  |
| Same pain                                                                                                                                                                   | 1         |                   | 25  |
| I do not know                                                                                                                                                               | 0         |                   | 0   |
| <b>14. The pain you are currently experiencing is:</b>                                                                                                                      | <b>25</b> |                   |     |
| Punctual                                                                                                                                                                    | 21        |                   | 84  |
| Continue                                                                                                                                                                    | 4         |                   | 16  |
| <b>If punctual, do you feel it:</b>                                                                                                                                         | <b>21</b> |                   |     |
| More than once a day                                                                                                                                                        | 4         |                   | 19  |
| Once a day                                                                                                                                                                  | 2         |                   | 9   |
| Less than once a day                                                                                                                                                        | 3         |                   | 14. |
| I do not know                                                                                                                                                               | 12        |                   | 57  |
| <b>If punctual, do you feel it more:</b>                                                                                                                                    | <b>21</b> |                   |     |
| The morning                                                                                                                                                                 | 5         |                   | 23  |
| The afternoon                                                                                                                                                               | 5         |                   | 23  |
| The evening                                                                                                                                                                 | 6         |                   | 28  |
| I do not know                                                                                                                                                               | 5         |                   | 23  |
| <b>15. When you are in pain, how do you express pain? (several choices possible)</b>                                                                                        | <b>25</b> |                   |     |
| Winces                                                                                                                                                                      | 6         |                   | 24  |
| Cries                                                                                                                                                                       | 11        |                   | 44  |
| Look/blinking                                                                                                                                                               | 4         |                   | 16  |
| Vocalizations                                                                                                                                                               | 7         |                   | 28  |
| Communication code                                                                                                                                                          | 7         |                   | 28  |
| No expression of pain                                                                                                                                                       | 13        |                   | 52  |
| Other                                                                                                                                                                       | 2         |                   | 8   |
| <b>16. When you feel pain, do you feel that certain elements increase the pain? (several choices possible)</b>                                                              | <b>25</b> |                   |     |
| Mood/emotions                                                                                                                                                               | 1         |                   | 4   |
| Temperature                                                                                                                                                                 | 4         |                   | 16  |
| Supine                                                                                                                                                                      | 3         |                   | 12  |
| Sitting                                                                                                                                                                     | 7         |                   | 28  |
| Care (nurses, physiotherapy, ...)                                                                                                                                           | 8         |                   | 32  |
| Touching                                                                                                                                                                    | 10        |                   | 40  |
| Tiredness                                                                                                                                                                   | 10        |                   | 40  |
| Physical exercises                                                                                                                                                          | 8         |                   | 32  |
| Equipment (specific cushion, ...)                                                                                                                                           | 2         |                   | 8   |
| None                                                                                                                                                                        | 2         |                   | 8   |
| Other                                                                                                                                                                       | 3         |                   | 12  |
| <b>17. When you feel pain, do you feel that certain elements decrease the pain? (several choices possible)</b>                                                              | <b>25</b> |                   |     |
| Mood/emotions                                                                                                                                                               | 0         |                   | 0   |
| Temperature                                                                                                                                                                 | 1         |                   | 4   |
| Supine                                                                                                                                                                      | 4         |                   | 16  |
| Sitting                                                                                                                                                                     | 6         |                   | 24  |
| Care (nurses, physiotherapy, ...)                                                                                                                                           | 2         |                   | 8   |

|                                                                                                                                                       |           |             |    |
|-------------------------------------------------------------------------------------------------------------------------------------------------------|-----------|-------------|----|
| Touching                                                                                                                                              | 10        |             | 40 |
| Tiredness                                                                                                                                             | 5         |             | 20 |
| Physical exercises                                                                                                                                    | 6         |             | 24 |
| Equipment (specific cushion, ...)                                                                                                                     | 3         |             | 12 |
| None                                                                                                                                                  | 3         |             | 12 |
| Other                                                                                                                                                 | 9         |             | 36 |
| <b>18. When you have pain, do you feel that pain affects your mental abilities? If yes, specify (several choices possible)</b>                        | <b>25</b> |             |    |
| Decreased concentration/attention                                                                                                                     | 4         |             | 16 |
| Increased mood swings                                                                                                                                 | 13        |             | 52 |
| Decreased memory capacity                                                                                                                             | 4         |             | 16 |
| Depression                                                                                                                                            | 6         |             | 24 |
| Tiredness                                                                                                                                             | 14        |             | 56 |
| None                                                                                                                                                  | 9         |             | 36 |
| <b>19. Does the pain disrupt your sleep?</b>                                                                                                          | <b>25</b> |             |    |
| Yes                                                                                                                                                   | 10        |             | 40 |
| No                                                                                                                                                    | 13        |             | 52 |
| I do not know                                                                                                                                         | 2         |             | 8  |
| <b>20. If yes, indicate on a scale ranging from 0 to 10 how much the pain disturbs your sleep (0 = no influence, 1 = strong influence)</b>            | <b>25</b> | 6.42 ± 3.23 |    |
| <b>21. When you are in pain, do you feel that pain affects your emotions?</b>                                                                         | <b>25</b> |             |    |
| Always                                                                                                                                                | 3         |             | 12 |
| Sometimes                                                                                                                                             | 4         |             | 16 |
| Rarely                                                                                                                                                | 14        |             | 56 |
| Never                                                                                                                                                 | 4         |             | 16 |
| <b>22. If yes, indicate on a scale ranging from 0 to 10 how pain affects your emotions (0 = no influence, 1 = strong influence)</b>                   | <b>25</b> | 4.68 ± 2.92 |    |
| <b>23. Do you take any pharmacological treatment to ease your pain?</b>                                                                               | <b>25</b> |             |    |
| Yes                                                                                                                                                   | 15        |             | 60 |
| No                                                                                                                                                    | 10        |             | 40 |
| <b>24. If yes, how often do you take this treatment?</b>                                                                                              | <b>15</b> |             |    |
| Several times a day                                                                                                                                   | 5         |             | 33 |
| Once a day                                                                                                                                            | 8         |             | 53 |
| Occasionally, when the pain is too strong                                                                                                             | 2         |             | 13 |
| <b>25. If yes, indicate on a scale ranging from 0 to 10 how effective this (these) treatment(s) is (are) (0 = no influence, 1 = strong influence)</b> | <b>25</b> | 6 ± 2.93    |    |
| <b>26. To relieve your pain, have you ever tried non-pharmacological treatments (example: meditation, hypnosis, etc.)?</b>                            | <b>25</b> |             |    |
| Yes                                                                                                                                                   | 3         |             | 12 |
| No                                                                                                                                                    | 21        |             | 84 |
| I do not know                                                                                                                                         | 1         |             | 4  |
| <b>27. If yes, indicate on a scale ranging from 0 to 10 how effective this (these) treatment(s) is (are) (0 = no influence, 1 = strong influence)</b> | <b>25</b> | 2 ± 1.73    |    |
| <b>28. Do you want to test a new pharmacological or non-pharmacological treatment? (several choices possible)</b>                                     | <b>25</b> |             |    |
| Yes, I would be ready to test a new pharmacological treatment                                                                                         | 12        |             | 48 |
| Yes, I would be ready to test a new non-pharmacological treatment                                                                                     | 6         |             | 24 |
| No, I wouldn't be ready to test a new pharmacological treatment                                                                                       | 7         |             | 28 |
| No, I wouldn't be ready to test a new non-pharmacological treatment                                                                                   | 14        |             | 56 |
