# Supplementary material for: French Survey on Pain Perception and Management in Patients with Locked-In Syndrome
Source: MDPI journal article supplement (doi:10.3390/diagnostics12030769), 2022-03-21
Supplement: s1 [file s1]

Table S4. Bivariate analysis of the relationship between the use of pain treatments and the presence of sleep disturbance or cognitive disabilities, or pain intensity.

| Variable, n (%)                                | Overall,<br>N =25 | Use of pharmacological<br>treatment |             | p-value <sup>1</sup> | Overall,<br>N =25 | Use of non-pharmacological<br>treatment |            |                       | p-value <sup>1</sup> |
|------------------------------------------------|-------------------|-------------------------------------|-------------|----------------------|-------------------|-----------------------------------------|------------|-----------------------|----------------------|
|                                                |                   | No, N = 10                          | Yes, N = 15 |                      |                   | No, N = 21                              | Yes, N = 3 | Do not<br>know, N = 1 |                      |
| <b>Influence on sleep,</b>                     |                   |                                     |             | 0.33                 |                   |                                         |            |                       | 0.4                  |
| No                                             | 13 (52%)          | 5 (20%)                             | 8 (32%)     |                      | 13 (52%)          | 10 (40%)                                | 3 (12%)    | 0 (0%)                |                      |
| Yes                                            | 10 (40%)          | 3 (12%)                             | 7 (28%)     |                      | 10 (40%)          | 9 (36%)                                 | 0 (0%)     | 1 (4%)                |                      |
| Do not know                                    | 2 (8%)            | 2 (8%)                              | 0 (0%)      |                      | 2 (8%)            | 2 (8%)                                  | 0 (0%)     | 0 (0%)                |                      |
| <b>Decrease in<br/>concentration/attention</b> |                   |                                     |             | 0.1                  |                   |                                         |            |                       | 0.76                 |
| No                                             | 11 (44%)          | 2 (8%)                              | 9 (36%)     |                      | 11 (44%)          | 9 (36%)                                 | 1 (4%)     | 1 (4%)                |                      |
| Yes                                            | 14 (56%)          | 8 (32%)                             | 6 (24%)     |                      | 14 (56%)          | 12 (48%)                                | 2 (8%)     | 0 (0%)                |                      |
| <b>Increase in mood swings</b>                 |                   |                                     |             | 0.69                 |                   |                                         |            |                       | 0.70                 |
| No                                             | 16 (64%)          | 7 (28%)                             | 9 (36%)     |                      | 16 (64%)          | 14 (56%)                                | 2 (8%)     | 0 (0%)                |                      |
| Yes                                            | 9 (36%)           | 3 (12%)                             | 6 (24%)     |                      | 9 (36%)           | 7 (28%)                                 | 1 (4%)     | 1 (4%)                |                      |
| <b>Decreased memory capacity</b>               |                   |                                     |             | 0.18                 |                   |                                         |            |                       | 0.66                 |
| No                                             | 19 (76%)          | 6 (24%)                             | 13 (52%)    |                      | 19 (76%)          | 15 (60%)                                | 3 (12%)    | 1 (4%)                |                      |
| Yes                                            | 6 (24%)           | 4 (16%)                             | 2 (8%)      |                      | 6 (24%)           | 6 (24%)                                 | 0 (0%)     | 0 (0%)                |                      |
| <b>Tiredness</b>                               |                   |                                     |             | 0.43                 |                   |                                         |            |                       | 0.39                 |
| No                                             | 12 (48%)          | 6 (24%)                             | 6 (24%)     |                      | 12 (48%)          | 9 (36%)                                 | 2 (8%)     | 1 (4%)                |                      |
| Yes                                            | 13 (52%)          | 4 (16%)                             | 9 (36%)     |                      | 13 (52%)          | 12 (48%)                                | 1 (4%)     | 0 (0%)                |                      |
| <b>Depression</b>                              |                   |                                     |             | 0.63                 |                   |                                         |            |                       | 0.21                 |
| No                                             | 21 (84%)          | 9 (36%)                             | 12 (48%)    |                      | 21 (84%)          | 18 (72%)                                | 3 (12%)    | 0 (0%)                |                      |
| Yes                                            | 4 (16%)           | 1 (4%)                              | 3 (12%)     |                      | 4 (16%)           | 3 (12%)                                 | 0 (0%)     | 1 (4%)                |                      |
| <b>None</b>                                    |                   |                                     |             | 0.63                 |                   |                                         |            |                       | 0.53                 |
| No                                             | 21 (84%)          | 9 (36%)                             | 12 (48%)    |                      | 21 (84%)          | 18 (72%)                                | 2 (8%)     | 1 (4%)                |                      |
| Yes                                            | 4 (16%)           | 1 (4%)                              | 3 (12%)     |                      | 4 (16%)           | 3 (12%)                                 | 1 (4%)     | 0 (0%)                |                      |
| <b>Pain intensity</b>                          |                   |                                     |             | > 0.99               |                   |                                         |            |                       | 0.17                 |
| Greater or equal to 5                          | 18 (72%)          | 7 (28%)                             | 11 (44%)    |                      | 18 (72%)          | 15 (60%)                                | 3 (12%)    | 0 (0%)                |                      |
| Lower than 5                                   | 7 (28%)           | 3 (12%)                             | 4 (16%)     |                      | 7 (28%)           | 6 (24%)                                 | 0 (0%)     | 1 (4%)                |                      |

<sup>1</sup>Fisher's exact test
