# Supplementary material for: French Survey on Pain Perception and Management in Patients with Locked-In Syndrome
Source: Diagnostics (Basel). 2022 Mar 21;12(3):769. doi: 10.3390/diagnostics12030769 (PMC8947195; doi:10.3390/diagnostics12030769)
Supplement: Supplementary file 1 [file diagnostics-12-00769-s001.zip]

Archive with 5 entries (5 files):
- Supplementary/CHERRIES.pdf
- Supplementary/Table S1.pdf
- Supplementary/Table S2.pdf
- Supplementary/Table S3.pdf
- Supplementary/Table S4.pdf
